# Supplementary material for: Sex and Death: The Effects of Innate Immune Factors on the Sexual Reproduction of Malaria Parasites
Source: PLOS journal article supplement (doi:10.1371/journal.ppat.1001309), 2011-03-03
Supplement: S3 (10.1371/journal.ppat.1001309.s003) [file journal.ppat.1001309.s003]

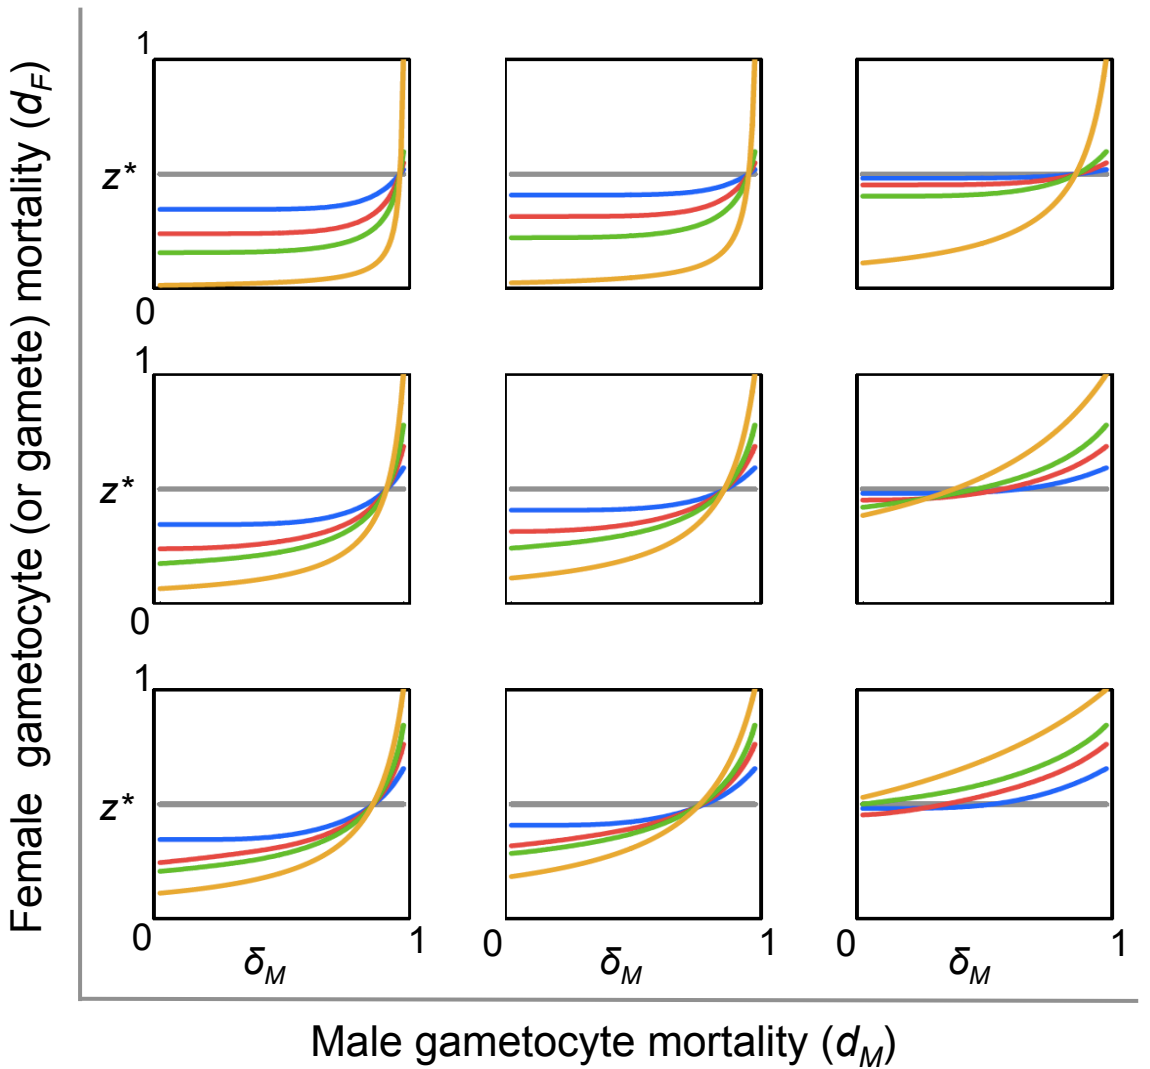

**Figure S3. Evolutionarily stable sex allocation strategies when sex- and stage-specific mortality rates vary ( $\chi=8$ ).** Effect of male and female gametocyte mortality and male gamete mortality on the ES gametocyte sex ratio ( $z^*$ ), for a clonal population, when the number of gametes per male gametocyte ( $\chi$ ) is 8. On each plot,  $z^*$  varies with male gamete mortality rate ( $\delta_M$ ). The coloured lines represent different gametocyte group sizes ( $q$ ): 2 (grey), 5 (blue), 10 (red), 20 (green) and  $\infty$  (yellow). Every plot depicts different parameter combinations of male gametocyte ( $d_M = 0.1; 0.5; 0.9$ ) and female mortality rate ( $d_F = 0.1; 0.5; 0.9$ ), with  $d_M$  increasing left to right and  $d_F$  increasing bottom to top.
